# Supplementary material for: A class of polytriazole metallogels via CuAAC polymerization: preparation and properties
Source: Royal Society of Chemistry journal article supplement (doi:10.1039/c7nj00610a), 2017-01-01
Supplement: c7nj00610a1.pdf [file c7nj00610a1.pdf]

**Electronic Supplementary Information for**  
**A class of polytriazole metallo gels *via* CuAAC**  
**polymerization: preparation and properties**

Lvyuan Ye, Liqiang Wan, Farong Huang\*

*Key Laboratory of Specially Functional Polymeric Materials and Related Technology (East China University of Science and Technology), Ministry of Education, Shanghai 200237, China*

*Corresponding Author E-mail address: [fhuanlab@ecust.edu.cn](mailto:fhuanlab@ecust.edu.cn)*

**Table of Contents**

Preparation of metallo gels

Fig. S1. Self-sustaining nature of as-synthesized Gel1

Fig. S2. Variation of  $G'$  and  $G''$  of Gel1, Gel2, Gel3 and Gel4 against temperature

Fig. S3.  $^1\text{H-NMR}$  spectra of PTAs (PTA1, PTA3 and PTA4) before and after the addition of  $0.5 \times 10^{-2} \text{ mmol mL}^{-1}$  of  $\text{Cu}^+$  ion in  $\text{DMSO-}d_6$

Table S1. Chemical shift of proton on triazole of four PTAs before and after the addition of  $0.5 \times 10^{-2} \text{ mmol mL}^{-1}$  of  $\text{Cu}^+$  ion in  $\text{DMSO-}d_6$

Table S2. Diffraction angel ( $2\theta$ ) of pristine PTAs and new diffraction shoulder peaks ( $2\theta'$ ) appeared in the PTA xerogels (Xgels)

---

## Preparation of metallogels

**Synthesis of Gel1.** To a solution of A1 (0.756 g, 6.0 mmol azide) and dipropargyl bisphenol A (0.912 g, 6.0 mmol alkyne) in DMF (7.1184 g), Cu(PPh<sub>3</sub>)<sub>3</sub>Br (0.1116 g, 0.12 mmol) was added. The resulting mixture was stirred at 70 °C until a dark brown gel, named as Gel1, was formed. The fresh Gel1 was immersed in distilled water for 5 d to remove DMF and then dehydrated by freeze-drying for 2 d to obtain brown xerogels, designated as Xgel1. HCl and EDTA aqueous solutions were used to remove the copper ions from the fresh gel to obtain pale beige polytriazoles, called as PTA1. IR (KBr, cm<sup>-1</sup>) v: 3141 (C-H, triazole ring), 1235 (C-O).

**Synthesis of Gel2.** To a solution of A2 (0.900 g, 6.0 mmol azide) and dipropargyl bisphenol A (0.912 g, 6.0 mmol alkyne) in DMF (7.6944 g), Cu(PPh<sub>3</sub>)<sub>3</sub>Br (0.1116 g, 0.12 mmol) was added. The resulting mixture was stirred at 70 °C until a dark brown gel, named as Gel2, was formed. The fresh Gel2 was immersed in distilled water for 5 d to remove DMF and then dehydrated by freeze-drying for 2 d to obtain dark green xerogels, designated as Xgel2. HCl and EDTA aqueous solutions were used to remove the copper ions from the fresh gel to obtain beige polytriazoles, called as PTA2. IR (KBr, cm<sup>-1</sup>) v: 3145 (C-H, triazole ring), 1155 (S=O), 1235 (C-O).

**Synthesis of Gel3.** To a solution of A3 (0.564 g, 6.0 mmol azide) and dipropargyl bisphenol A (0.912 g, 6.0 mmol alkyne) in DMF (6.3504 g), Cu(PPh<sub>3</sub>)<sub>3</sub>Br (0.1116 g, 0.12 mmol) was added. The resulting mixture was stirred at 70 °C until a dark brown gel, named as Gel3, was formed. The fresh Gel3 was immersed in distilled water for 5 d to remove DMF and then dehydrated by freeze-drying for 2 d to obtain yellow-brown xerogels, designated as Xgel3. HCl and EDTA aqueous solutions were used to remove the copper ions from the fresh gel to obtain light yellow polytriazoles, called as PTA3. IR (KBr, cm<sup>-1</sup>) v: 3136 (C-H, triazole ring), 1230 (C-O).

**Synthesis of Gel4.** To a solution of A4 (0.792 g, 6.0 mmol azide) and dipropargyl bisphenol A (0.912 g, 6.0 mmol alkyne) in DMF (7.2624 g), Cu(PPh<sub>3</sub>)<sub>3</sub>Br (0.1116 g, 0.12 mmol) was added. The resulting mixture was stirred at 70 °C until a dark brown

---

gel, named as Gel4, was formed. The fresh Gel4 was immersed in distilled water for 5 d to remove DMF and then dehydrated by freeze-drying for 2 d to obtain yellow-brown xerogels, designated as Xgel4. HCl and EDTA aqueous solutions were used to remove the copper ions from the fresh gel to obtain light yellow polytriazoles, called as PTA4. IR (KBr,  $\text{cm}^{-1}$ )  $\nu$ : 3136 (C-H, triazole ring), 1230 (C-O).

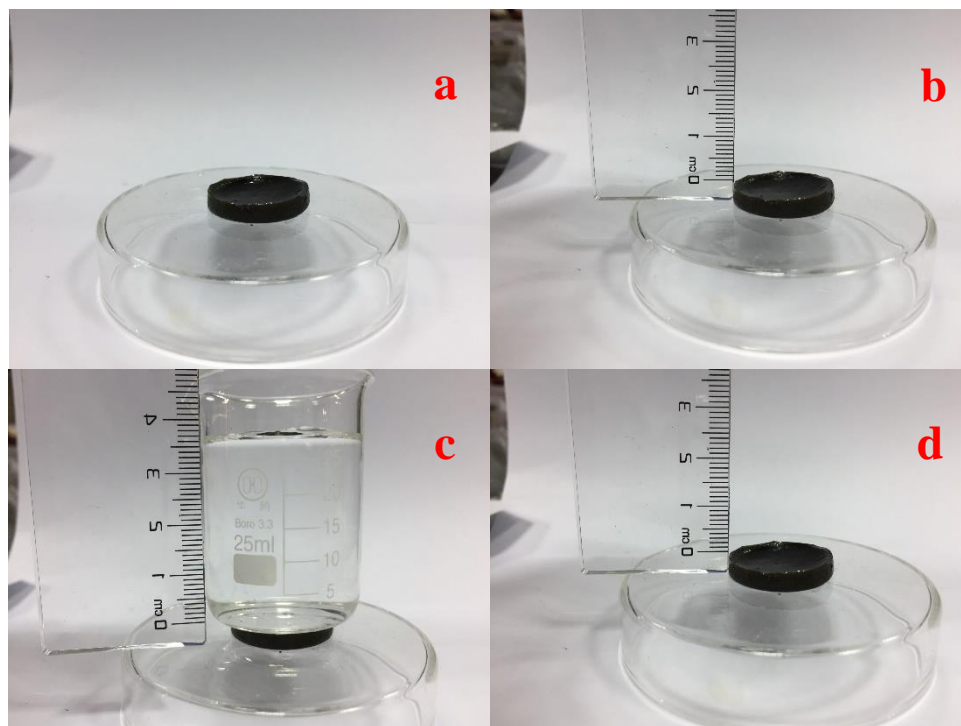

Fig. S1 Self-sustaining nature of as-synthesized Gel1. (a) The Gel1 was tailored to disk shape. The disk (b) before (c) during and (d) after keeping a 25 mL water filled beaker atop of the disk for several hours showing negligible shrinking/compression of the gel matrix.

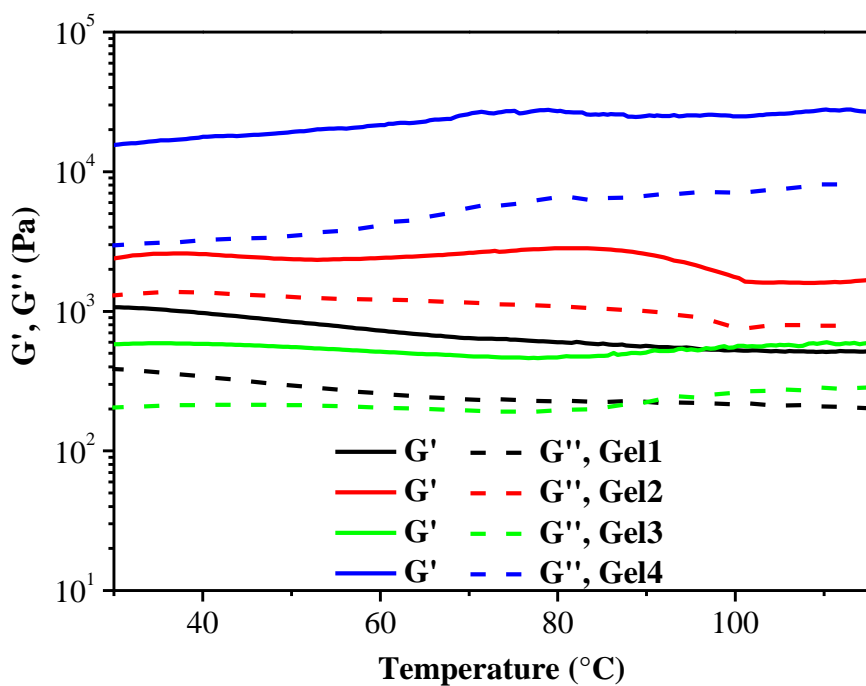

Fig. S2 Variation of  $G'$  and  $G''$  of Gel1, Gel2, Gel3 and Gel4 against temperature. Solid concentration: 20 wt%. Solvent: DMF. Scanning frequency: 1 Hz. Strain: 10 %.

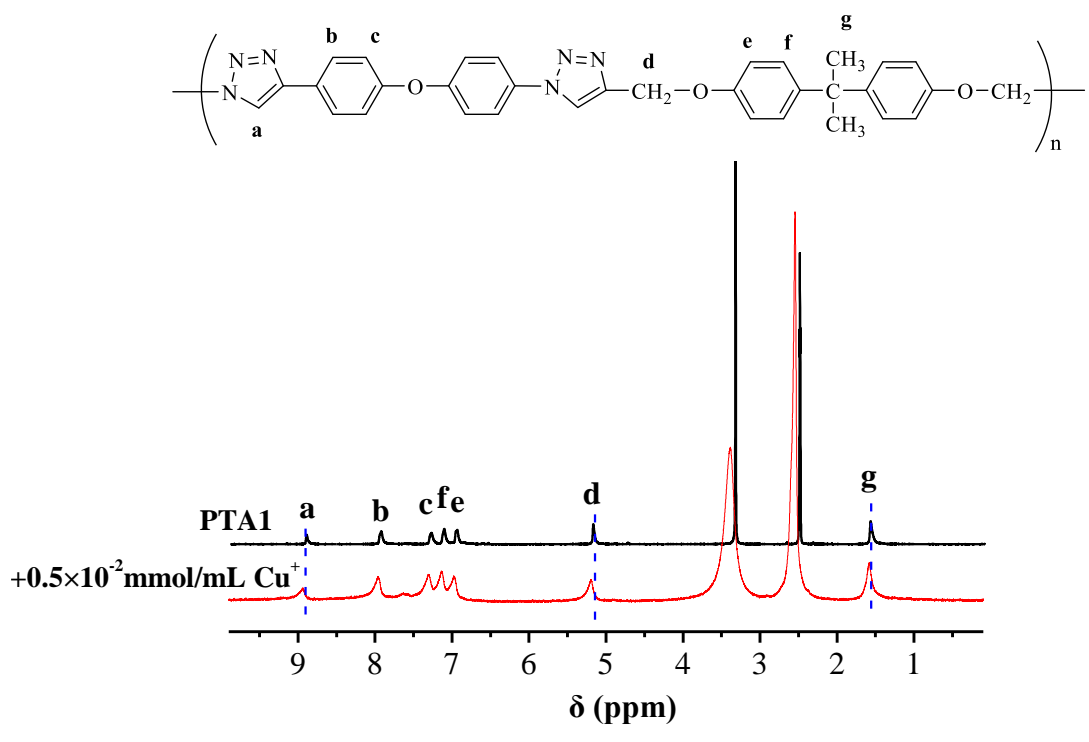

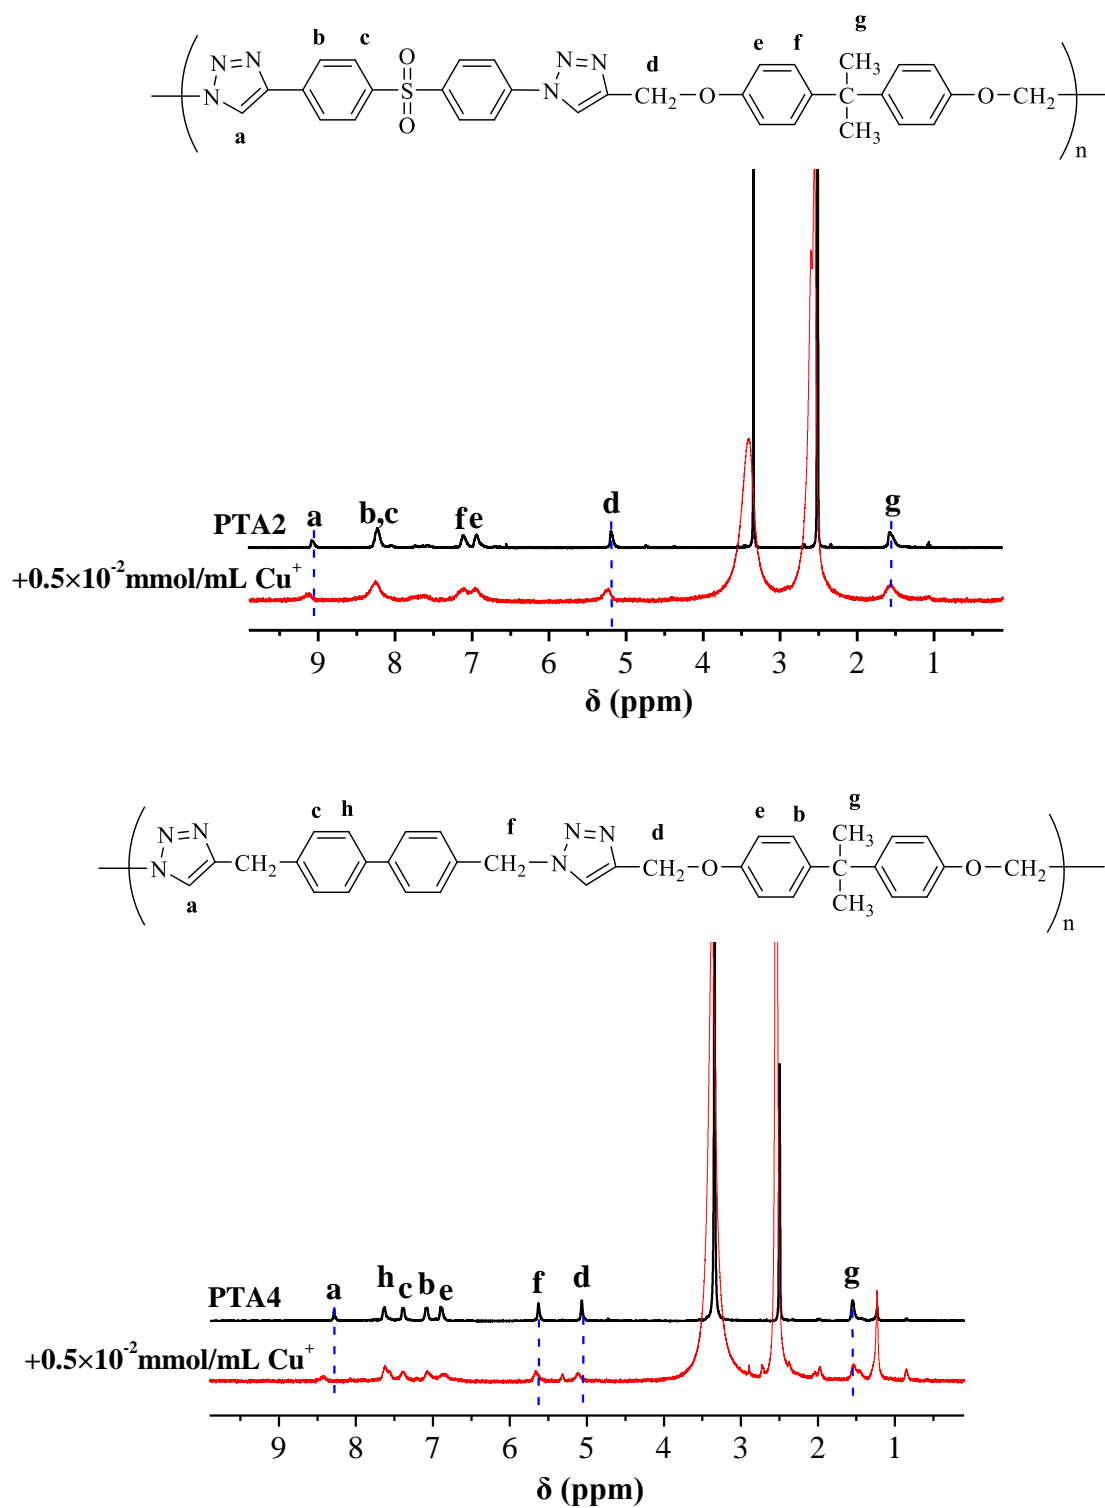

Fig. S3  $^1\text{H-NMR}$  spectra of PTAs (PTA1, PTA3 and PTA4) before and after the addition of  $0.5 \times 10^{-2} \text{ mmol mL}^{-1}$  of  $\text{Cu}^+$  ion in  $\text{DMSO-}d_6$

Table S1 Chemical shift of proton on triazole of four PTAs before and after the addition of  $0.5 \times 10^{-2}$  mmol mL<sup>-1</sup> of Cu<sup>+</sup> ion in DMSO-*d*<sub>6</sub>.

|                              | Proton on triazole (ppm) |             |             |             |
|------------------------------|--------------------------|-------------|-------------|-------------|
|                              | <b>PTA1</b>              | <b>PTA2</b> | <b>PTA3</b> | <b>PTA4</b> |
| Blank                        | 8.92                     | 9.08        | 8.24        | 8.29        |
| After adding Cu <sup>+</sup> | 8.94                     | 9.13        | 8.41        | 8.46        |

Table S2 Diffraction angel ( $2\theta$ ) of pristine PTAs and new diffraction shoulder peaks ( $2\theta'$ ) appeared in the PTA xerogels (Xgels).

| Code           | PTA1/Xgel1 | PTA2/Xgel2 | PTA3/Xgel3 | PTA4/Xgel4 |
|----------------|------------|------------|------------|------------|
| $2\theta$ (°)  | 19.25      | 19.02      | 19.78      | 20.01      |
| $2\theta'$ (°) | 21.78      | 21.93      | 21.55      | 23.57      |
